# Supplementary material for: Enhancing hydrophilicity of photoacoustic probes for effective ratiometric imaging of hydrogen peroxide
Source: Royal Society of Chemistry journal article supplement (doi:10.1039/c8tb01158c), 2018-01-01
Supplement: c8tb01158c1.pdf [file c8tb01158c1.pdf]

## Supporting Information

### **Enhancing Hydrophilicity of Photoacoustic Probes for Effective Ratiometric Imaging of Hydrogen Peroxide**

Xiaomei Lu,<sup>a</sup> Meng Zhao,<sup>a</sup> Pengfei Chen,<sup>a</sup> Quli Fan,<sup>\*, b</sup> Wenjun Wang,<sup>c</sup> and Wei Huang,<sup>d</sup>

*<sup>a</sup>Key Laboratory of Flexible Electronics (KLOFE) & Institute of Advanced Materials (IAM), Jiangsu National Synergetic Innovation Center for Advanced Materials (SICAM), Nanjing Tech University (NanjingTech), 30 South Puzhu Road, Nanjing 211816, China;*

*<sup>b</sup>Key Laboratory for Organic Electronics and Information Displays & Jiangsu Key Laboratory for Biosensors, Institute of Advanced Materials (IAM), Jiangsu National Synergetic Innovation Center for Advanced Materials (SICAM), Nanjing University of Posts & Telecommunications, 9 Wenyuan Road, Nanjing 210023, China. E-mail: iamqlfan@njupt.edu.cn;*

*<sup>c</sup>Key Lab of Optical Communication Science and Technology of Shandong Province & School of Physics Science and Information Engineering, Liaocheng University, Liaocheng 252059;*

*<sup>d</sup>Shaanxi Institute of Flexible Electronics (SIFE), Northwestern Polytechnical University (NPU), 127 West Youyi Road, Xi'an 710072, Shaanxi, China.*

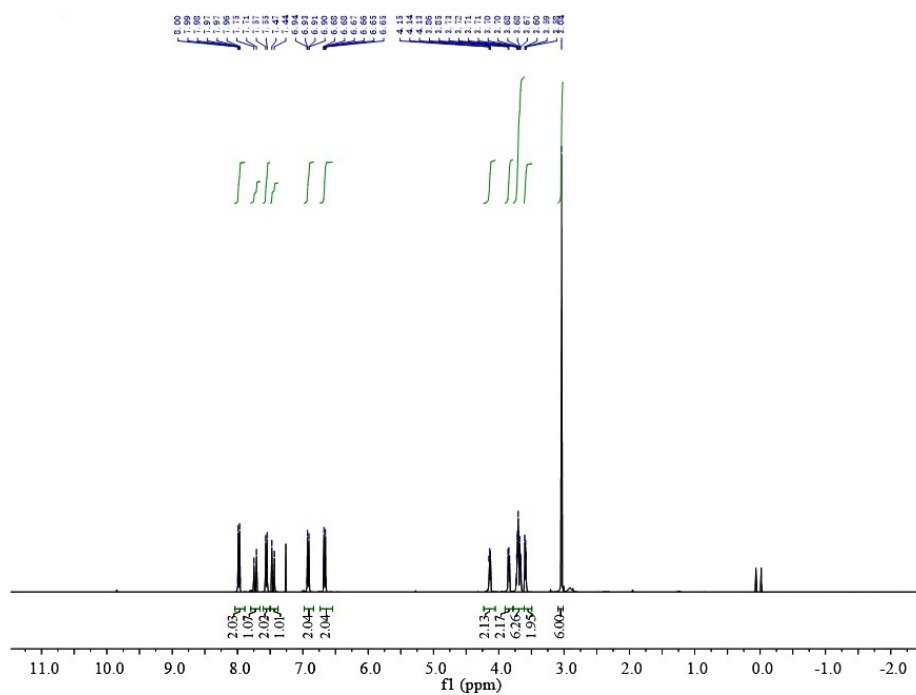

**Figure S1.** <sup>1</sup>H-NMR spectrum of compound 2a in CDCl<sub>3</sub>.

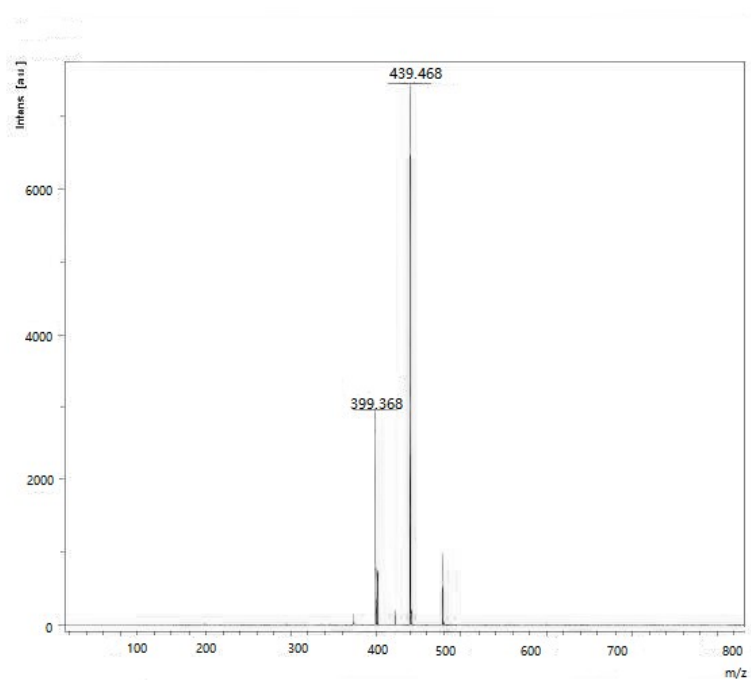

**Figure S2.** MALDI-TOF-MS of compound 2a.

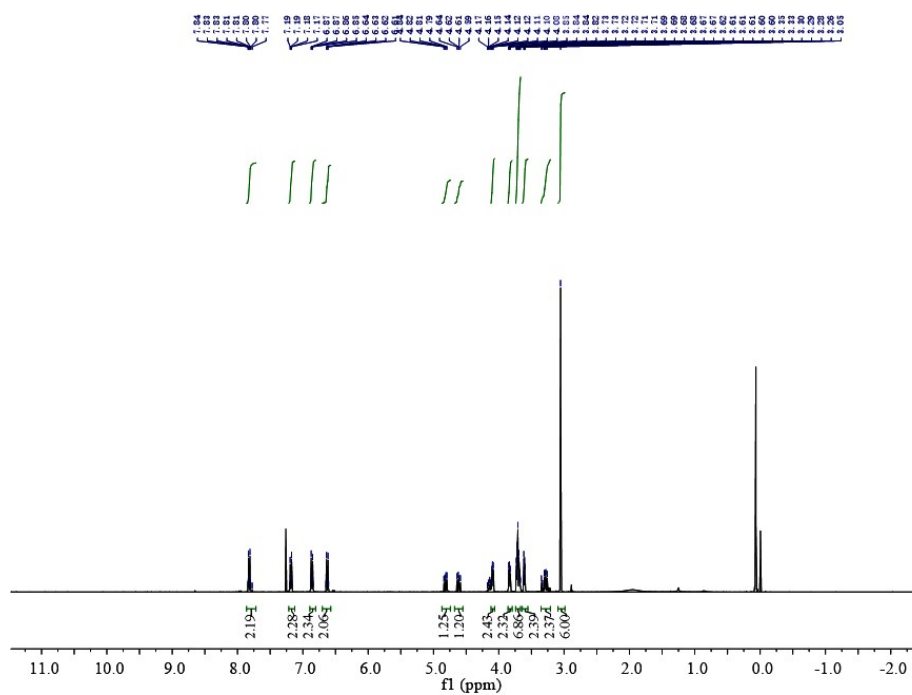

**Figure S3.** <sup>1</sup>H-NMR spectrum of compound 3a in CDCl<sub>3</sub>.

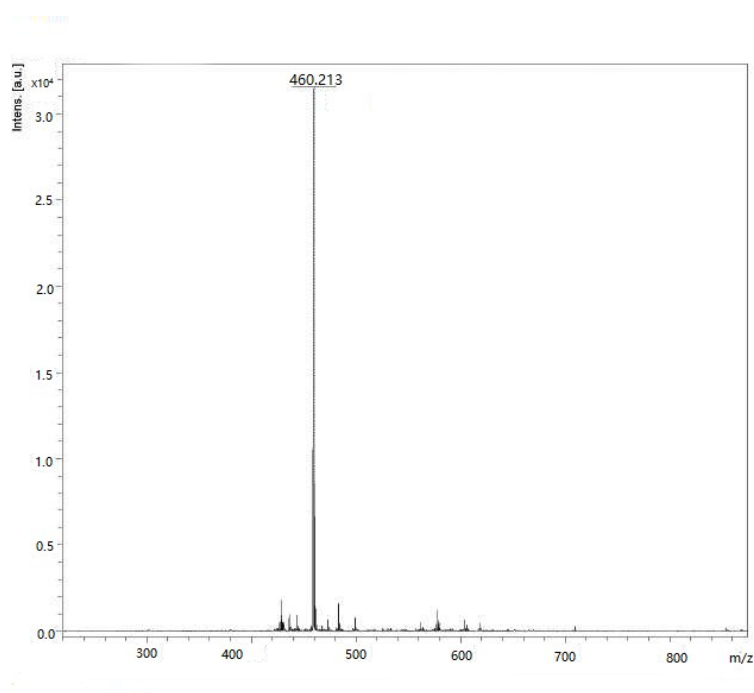

**Figure S4.** MALDI-TOF-MS of compound 3a.

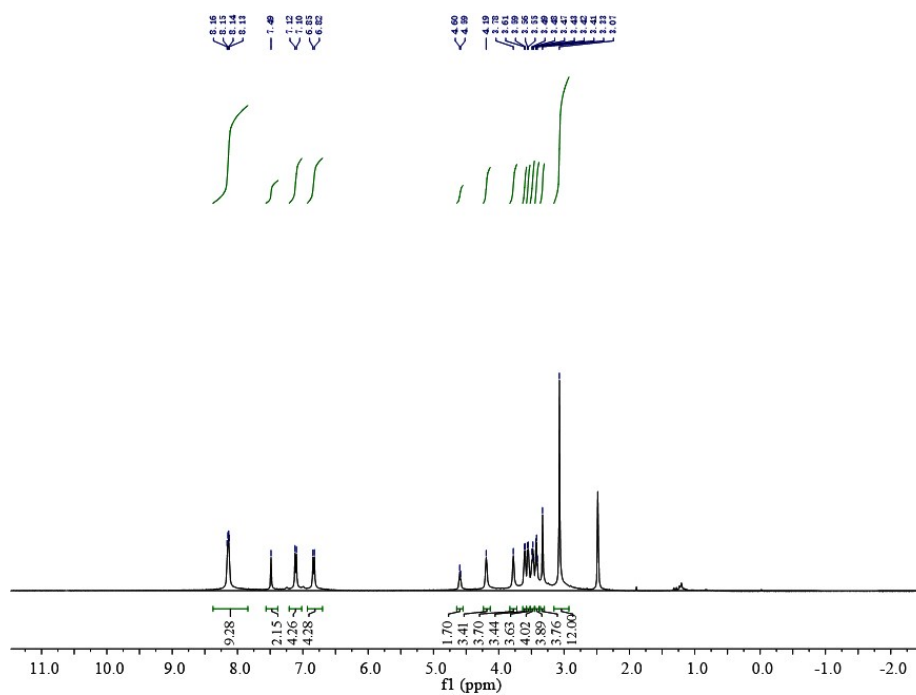

**Figure S5.**  $^1\text{H}$ -NMR spectrum of compound 4a in DMSO- $d_6$ .

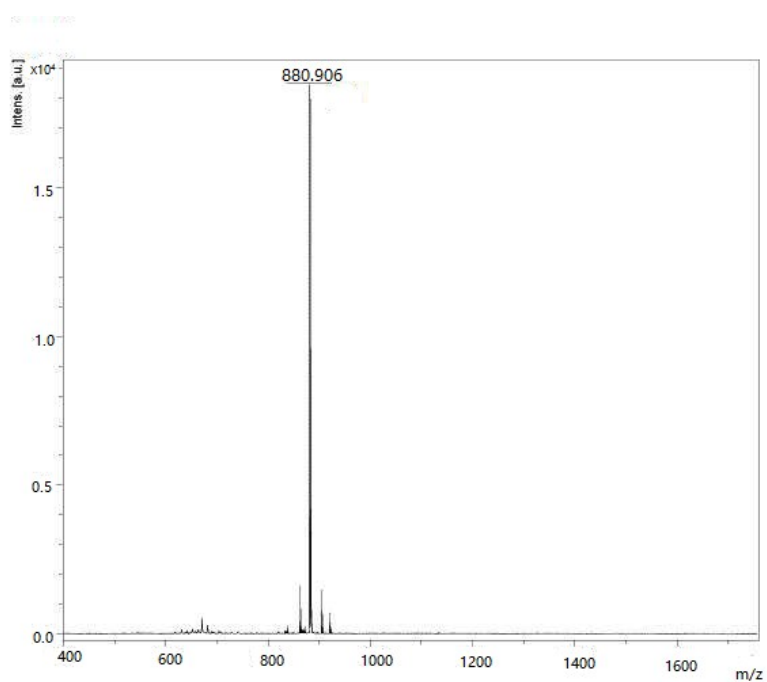

**Figure S6.** MALDI-TOF-MS of compound 4a.

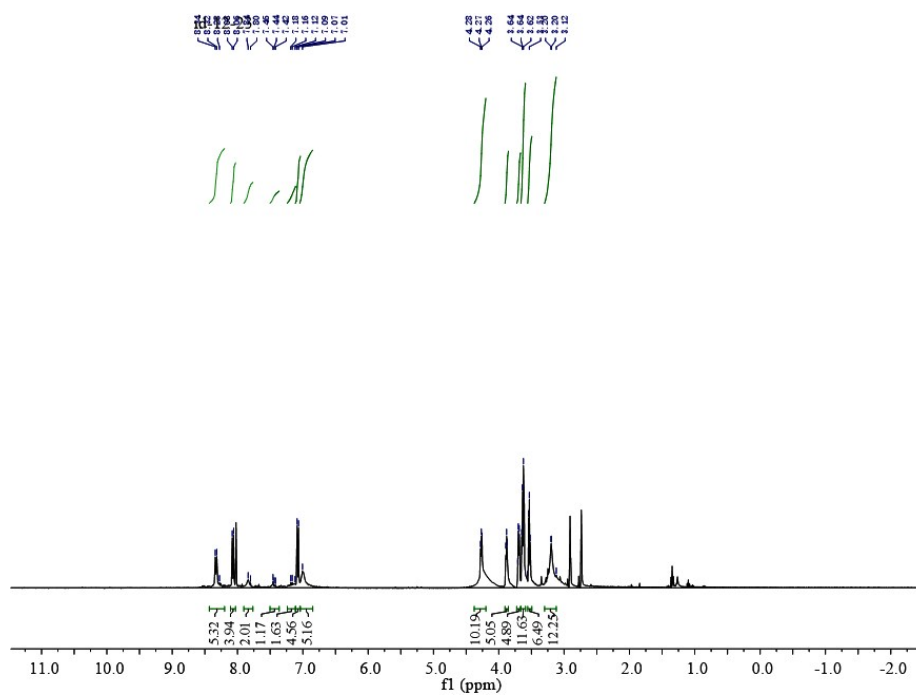

**Figure S7.** <sup>1</sup>H NMR spectrum of compound 5a in DMF-d<sub>7</sub>.

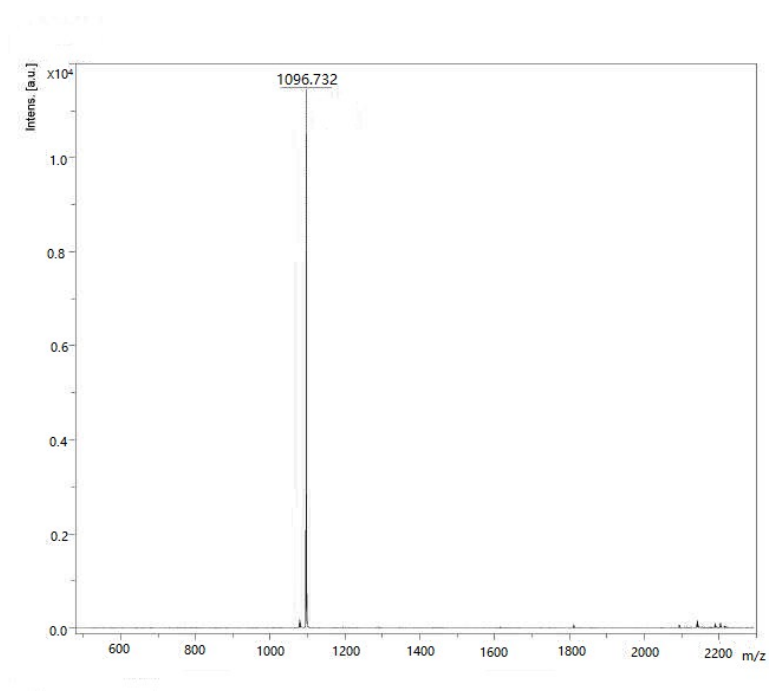

**Figure S8.** MALDI-TOF-MS of compound 5a.

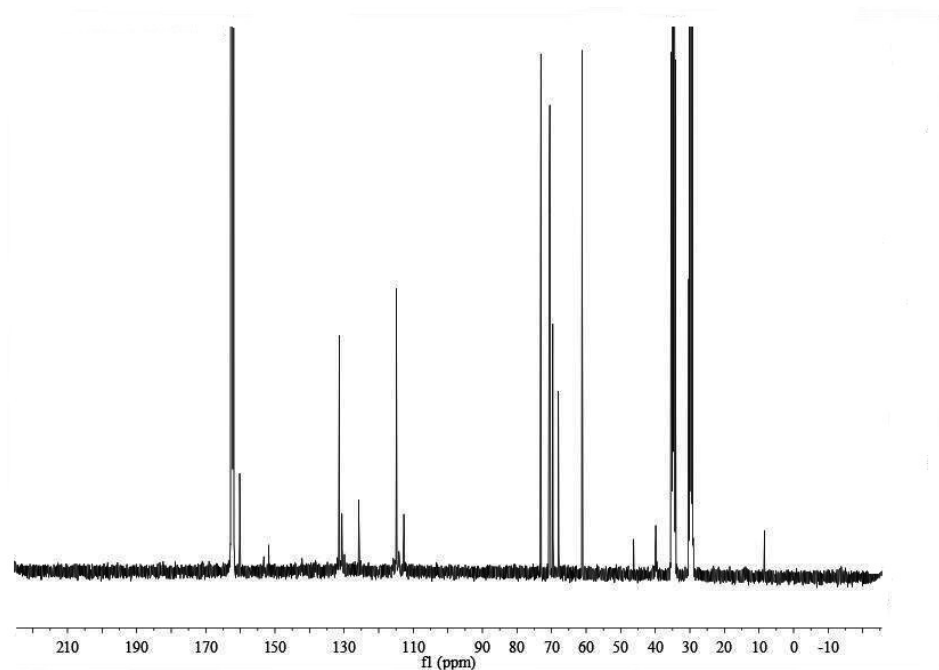

**Figure S9.**  $^{13}\text{C}$  NMR spectrum of compound 5a in  $\text{DMF-d}_7$ .

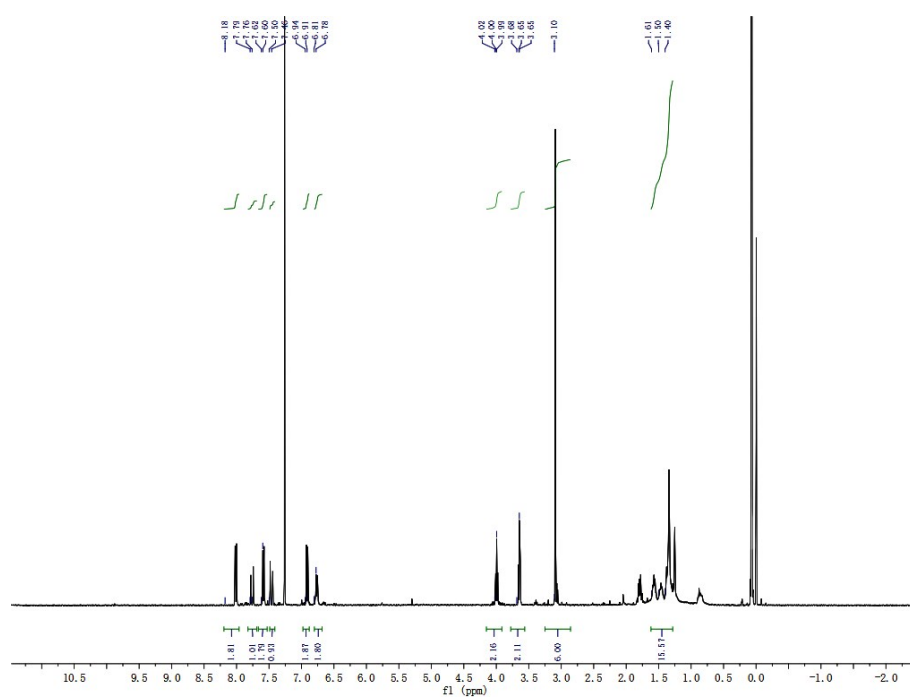

**Figure S10.**  $^1\text{H}$  NMR spectrum of compound 2b in  $\text{CDCl}_3$ .

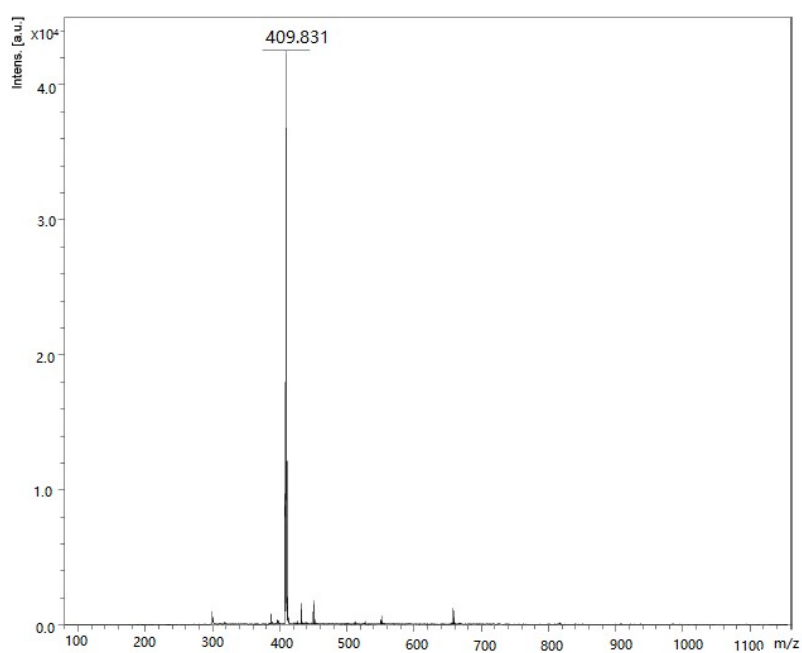

**Figure S11.** MALDI-TOF-MS of compound 2b.

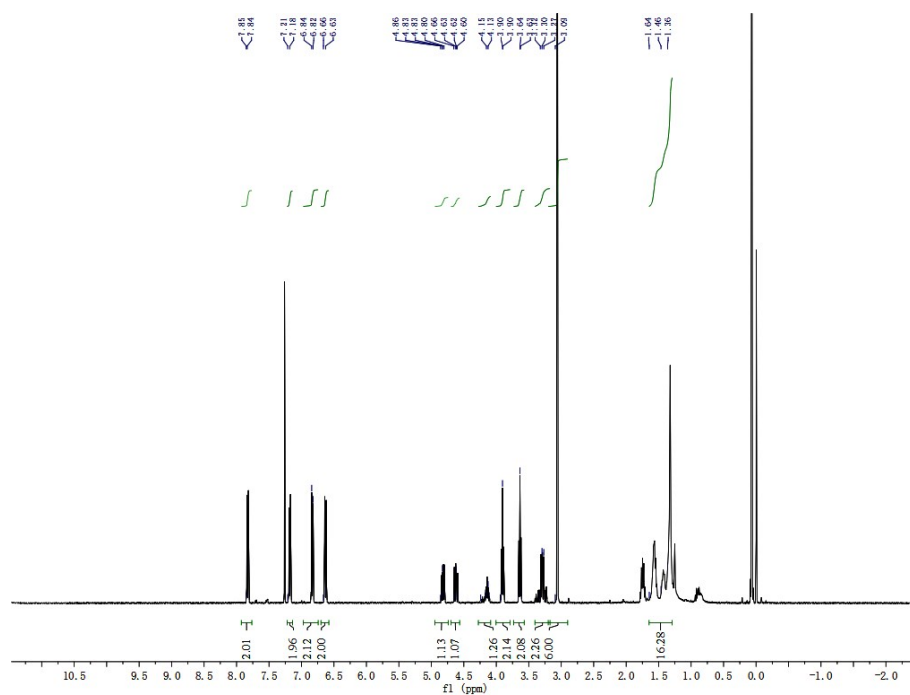

**Figure S12.** <sup>1</sup>H NMR spectrum of compound 3b in CDCl<sub>3</sub>.

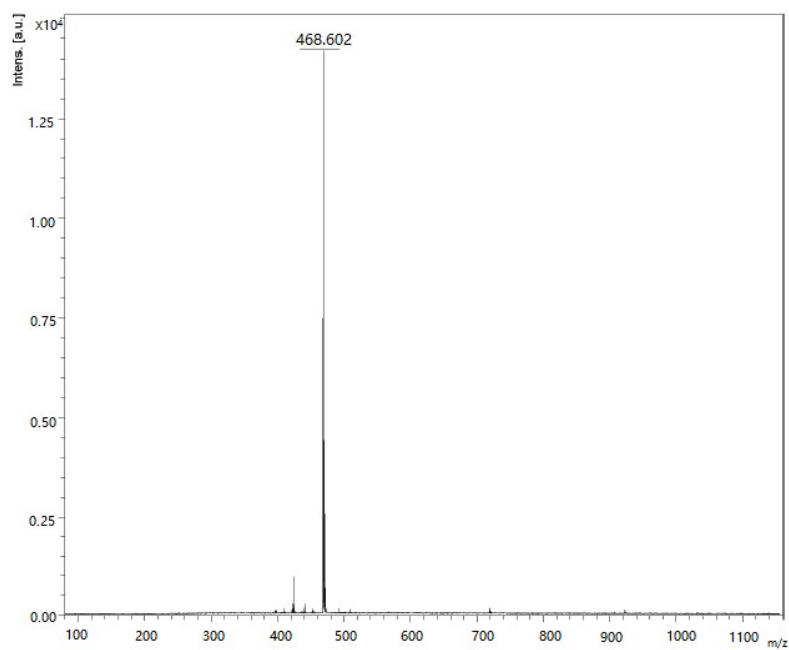

**Figure S13.** MALDI-TOF-MS of compound 3b.

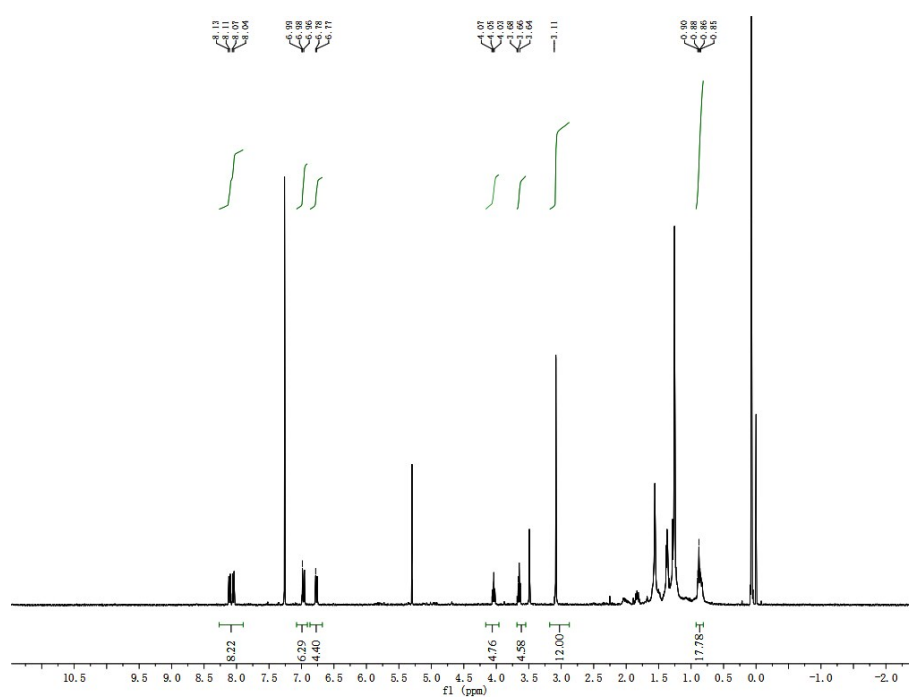

**Figure S14.** <sup>1</sup>H NMR spectrum of compound 4b in CDCl<sub>3</sub>.



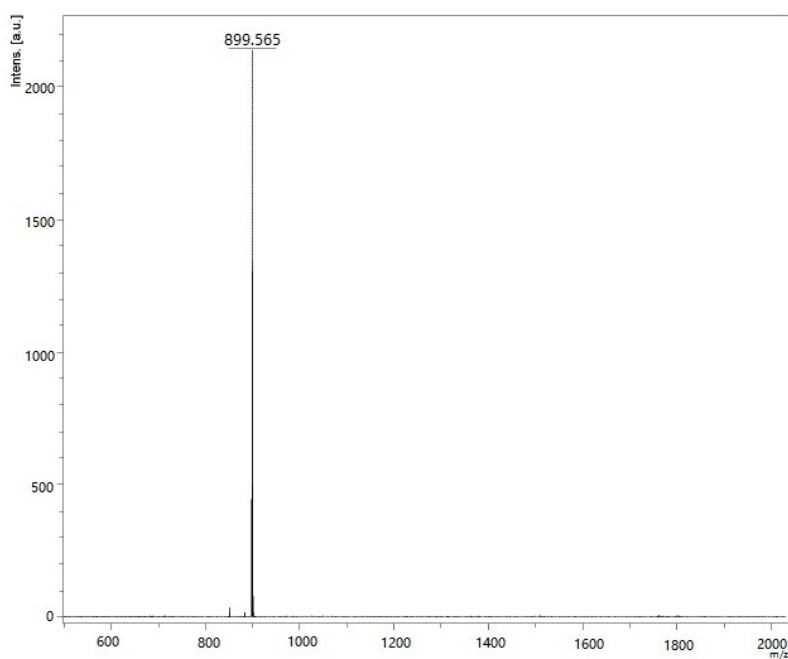

**Figure S15.** MALDI-TOF-MS of compound 4b.

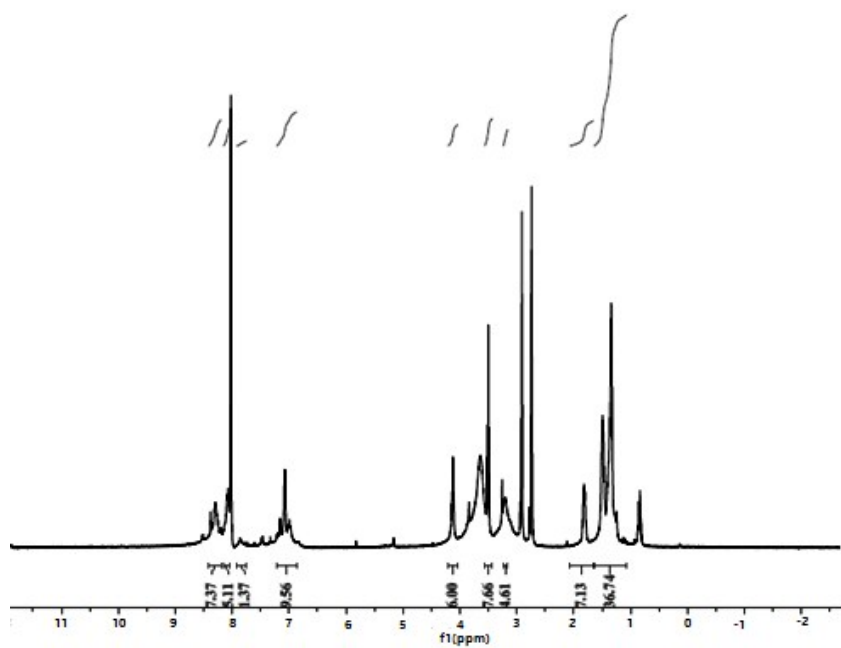

**Figure S16.** <sup>1</sup>H NMR spectrum of compound 5b in DMF-d<sub>7</sub>.

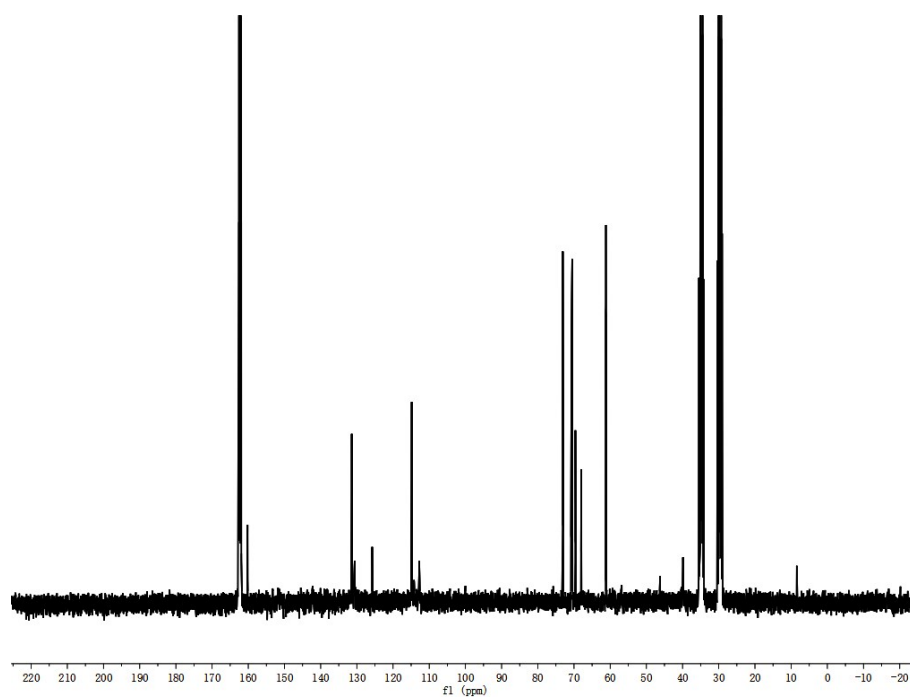

**Figure S17.**  $^{13}\text{C}$  NMR spectrum of compound 5b in DMF- $d_7$ .

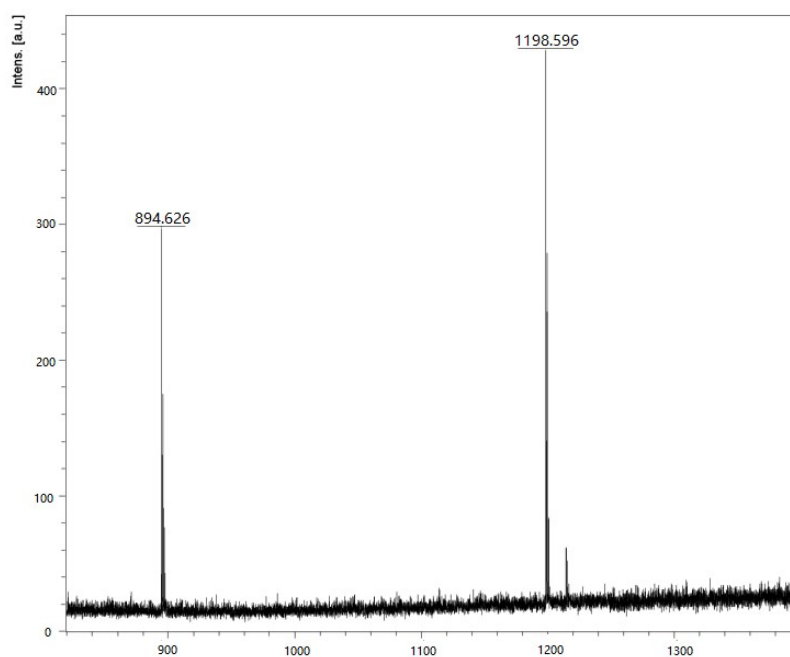

**Figure S18.** MALDI-TOF-MS of the Alk-Aza-BODIPY-BAPE probe in THF treated by  $\text{H}_2\text{O}_2$ .

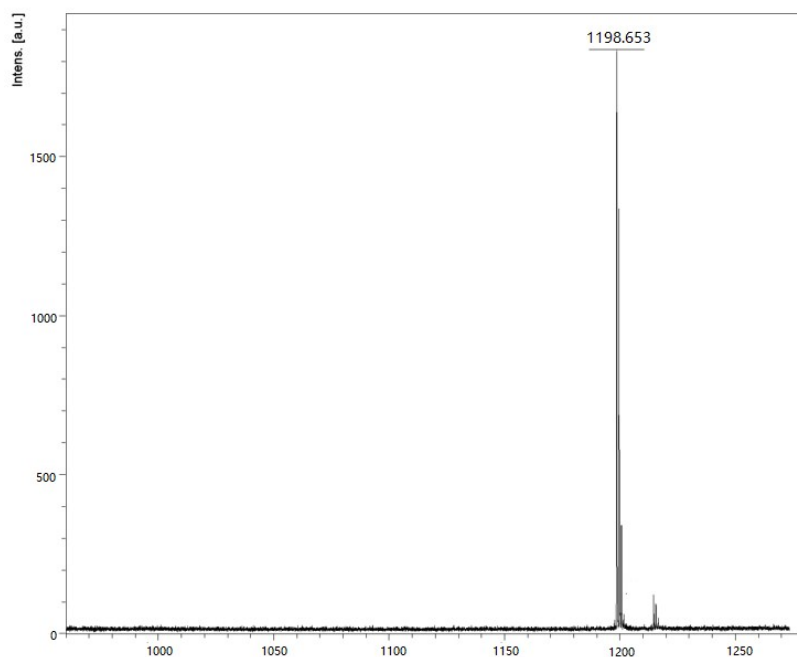

**Figure S19.** MALDI-TOF-MS of the Alk-Aza-BODIPY-BAPE probe in THF treated by  $\text{ONOO}^-$ .

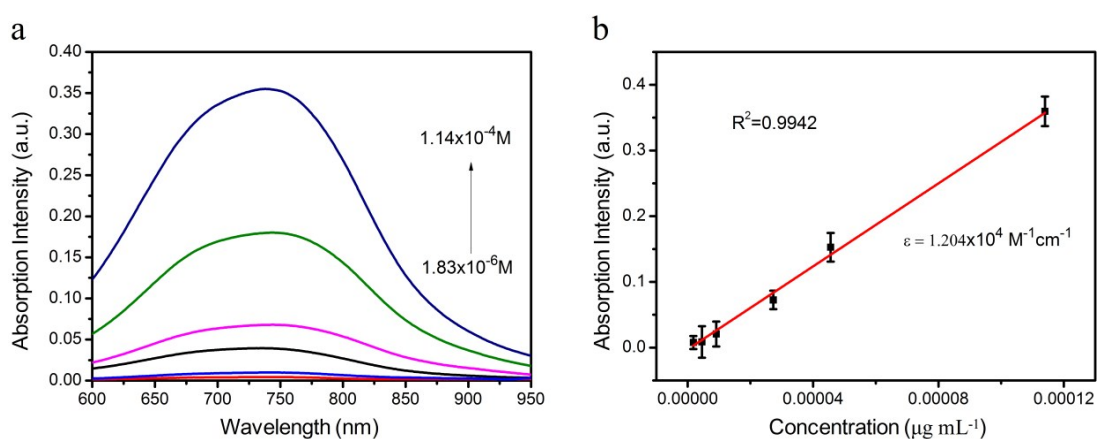

**Figure S20.** a) Absorption spectra of the OEG-Aza-BODIPY-BAPE probe with a series of concentrations in  $1 \times \text{PBS}$  ( $\text{pH} = 7.4$ ). b) The plot of optical density at 720 nm versus concentration.

The straight line is liner least-squares fit to the data.

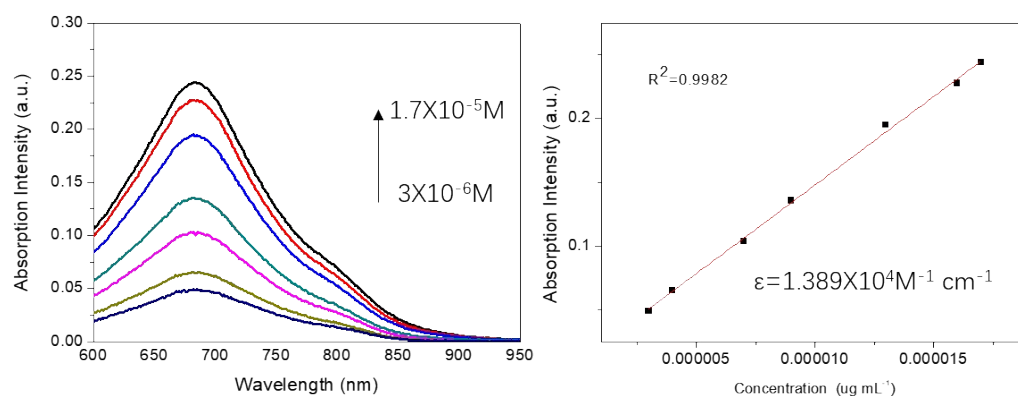

**Figure S21.** a) Absorption spectra of the Alk-Aza-BODIPY-BAPE probe with a series of concentrations in  $1 \times \text{PBS}$  (pH = 7.4). b) The plot of optical density at 700 nm versus concentration.

The straight line is liner least-squares fit to the data.

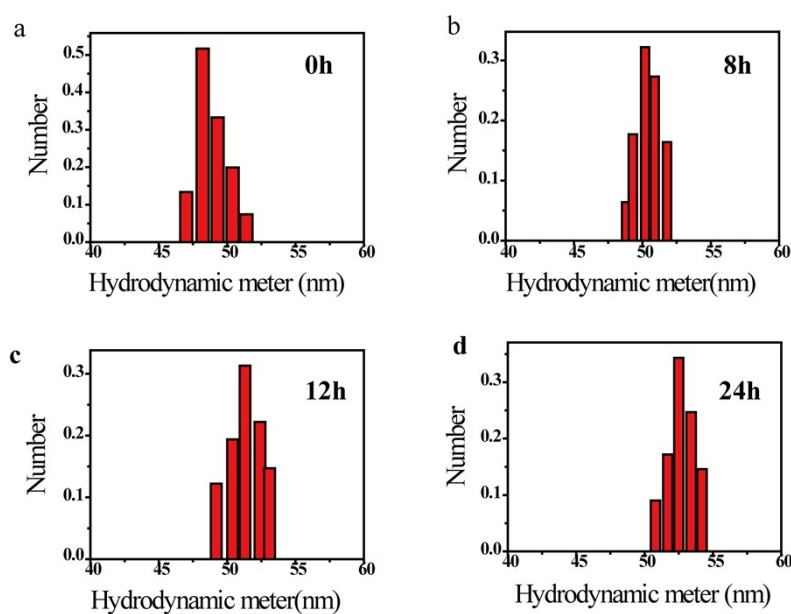

**Figure S22.** Hydrodynamic size change of OEG-Aza-BODIPY-BAPE NPs in PBS at different time.

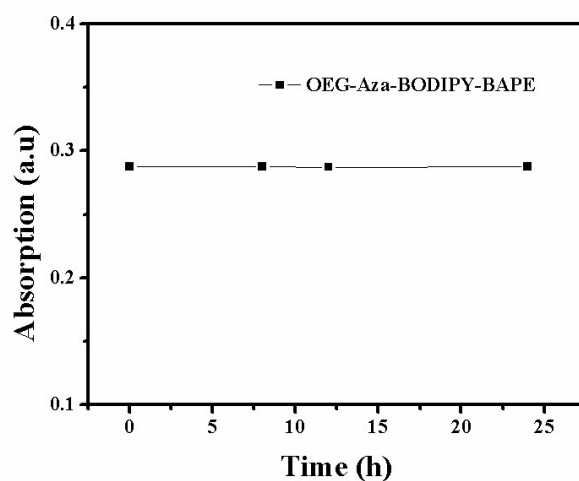

**Figure S23.** Absorption spectrum of OEG-Aza-BODIPY-BAPE in H<sub>2</sub>O with 24 h.

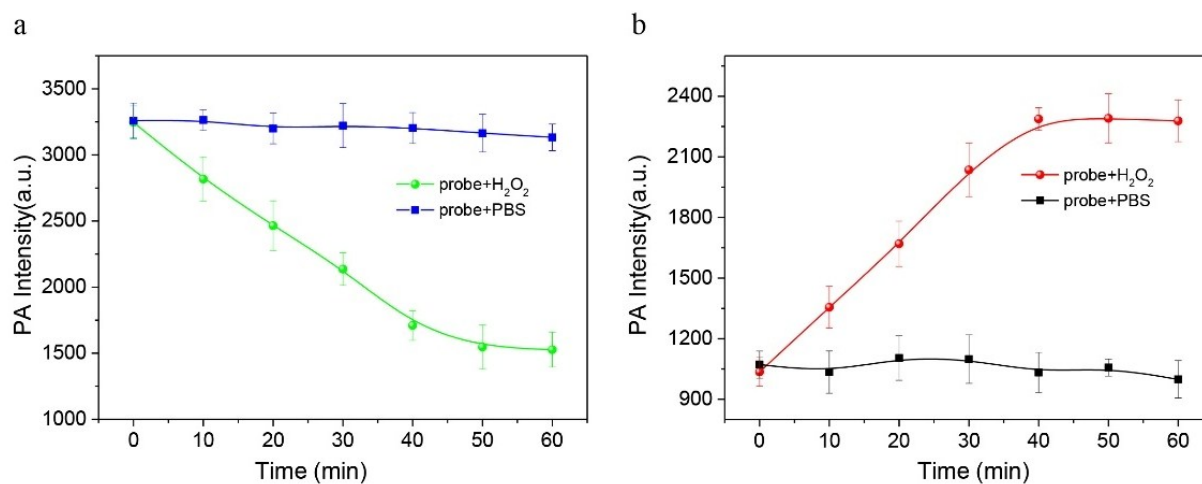

**Figure S24.** a) The PA intensity of the OEG-Aza-BODIPY-BAPE probe at 720 nm in the presence of H<sub>2</sub>O<sub>2</sub> (green line) and PBS (blue line) in 1 × PBS (pH = 7.4). b) The PA intensity of the probe at 825 nm in the presence of H<sub>2</sub>O<sub>2</sub> (red line) and PBS (black line) in 1 × PBS (pH = 7.4). Error bars were based on error of mean (n = 3).

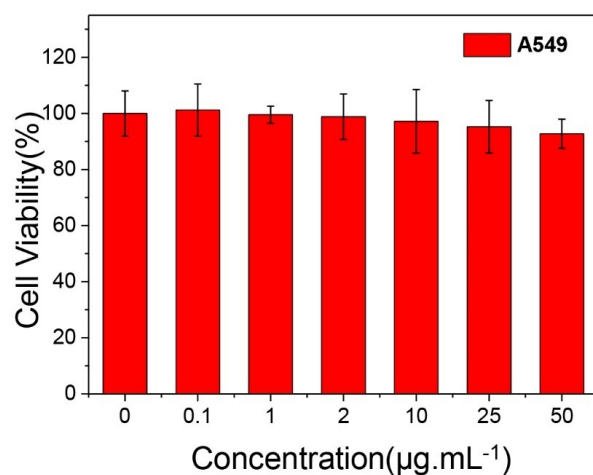

**Figure S25.** Cytotoxicity of A549 cells after incubation with the OEG-Aza-BODIPY-BAPE probe with different concentrations for 24 h.

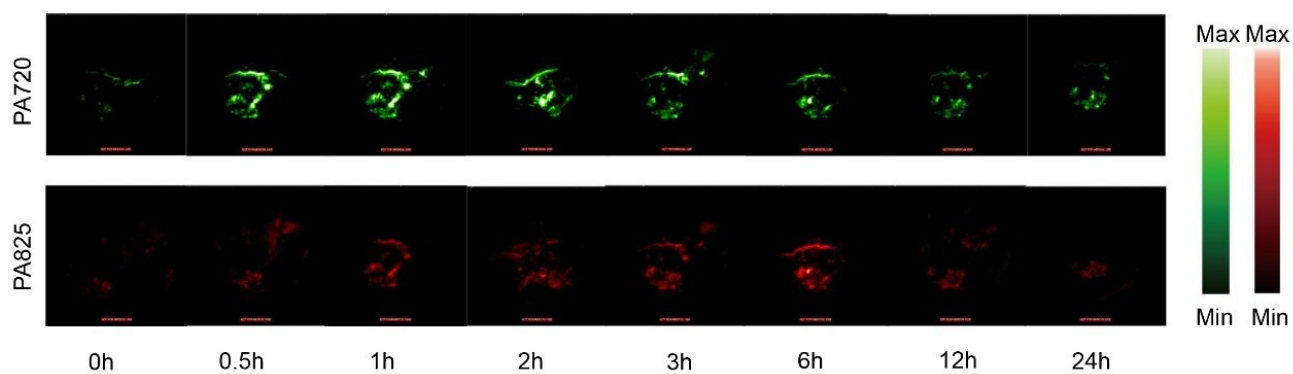

**Figure S26.** Representative PA images of tumor in a nude mice before and 0.5, 1, 2, 3, 6, 12, 24 h after the injection of the OEG-Aza-BODIPY-BAPE probe ( $200 \mu\text{L}$ ,  $100 \mu\text{g mL}^{-1}$ ).

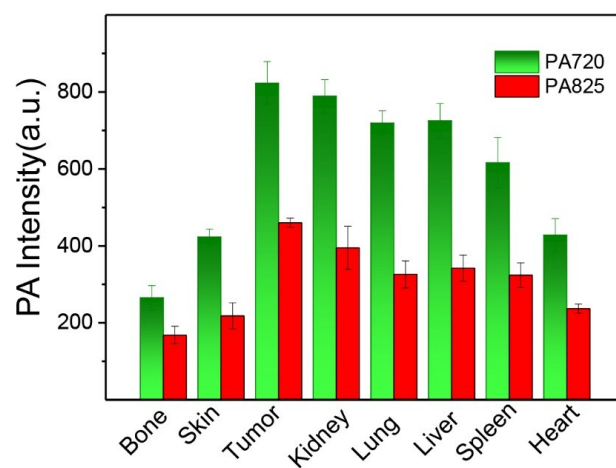

**Figure S27.** *Ex vivo* PA quantification of major organs of mice after systemic administration of the OEG-Aza-BODIPY-BAPE probe at 720 nm and 825 nm. Error bars were based on error of mean (n = 3).
